# Supplementary material
Source: PubMed Central journal article supplement (PMC2856928)
Supplement: NIHMS193595-supplement-Supplementary_Figure_Legends__Figures_S1-S3__Tables_S1-S5.pdf [file NIHMS193595-supplement-Supplementary_Figure_Legends__Figures_S1-S3__Tables_S1-S5.pdf]

## **Supplemental Figure Legends**

Supplemental Figure 1. A. Hybridization and flow chart of the multiple yellow strategy used to detect significant gene expression regulation for 1week CCH and CIH. Color of the block indicates whether Cy3 (green) or Cy5 (red) was used to label the extract. Each of the six arrays used for this timepoint is represented by a two-color rectangle in which the symbols indicate the treatment (C = CCH, N = normoxia, I = CIH), the time point (here 1 week), the gender (M = male, F = female) and the animal number. C1, N1 and I1 indicate the average expression level after the 1w CCH, normoxia or CIH in the red/green/all labeled extracts, and C1/N1 and I1/N1 indicate the expression ratio for 1 week exposure to CCH or CIH for red/green/all labeled extracts. An additional flow chart in which the averages were computed separately for genders was used and the final results averaged between them. B. Representative image of a hybridized slide. Most spots should be yellow because cDNAs from two individual mice of the same gender received the same treatment, either hypoxia or the age matched control. In some spots, the color deviates to red or green indicating gene expression variations between the two individual mice, but not the differential regulations between hypoxia and the control.

Supplemental Figure 2. Sub-profiling of altered genes in CCH and CIH treated mice hearts. (A and B) Most genes of ribosomal protein subunits were up-regulated in CCH but down-regulated in CIH treated mice hearts, suggesting the differential efficiency of protein synthesis. (C) Most genes of the Rho GTPase family were up-regulated in CCH but all down-regulated in CIH treated mice hearts. (D) Most genes in the MAPK pathway were up-regulated in CCH treated mice hearts. (E) Genes of mitochondrial complex I subunits were mostly up-regulated in CCH but down-regulated in CIH after 1 and 2 weeks of treatment, suggesting differential functional state of mitochondria. (F) Genes related to fibrosis were up-regulated in both CCH and CIH treated mice hearts. (G) Genes related to

cardiac development or growth were mostly up-regulated in CCH but down-regulated in CIH treated animals.

Supplemental Figure 3. Organ weight of the brain, lung and kidney after CCH and CIH treatment (n=8 to16). The weight of the brain and kidney was lower significantly in both CCH and CIH treated animals, but the wet and dry weight of the lung were higher by 4 weeks of age in both CCH and CIH treated mice when they were compared to the age matched NC. These results suggest that the heart and lung have the similar fashion in responding to hypoxic stress. \* indicates  $p<0.05$  and \*\* indicates  $p<0.01$  when CCH or CIH compares to normoxic control; whereas + indicates  $p<0.05$ , ++ indicates  $p<0.01$  when CCH compares to CIH.

Supplemental Figure 4. Image of the gene cluster of the individual values and expression ratios of the 7028 adequately quantified genes in all arrays that passed both the  $\pm 1.5$  fold change and  $p<0.05$  criteria in a paired heteroscedastic Student's t-test for at least one comparison between the average expression levels among treatments, namely: 1,2,4I vs 1,2,4N, 1,2,4C vs 1,2,4N, 1,2,4C vs 1,2,4I, where the numbers 1, 2 and 4 indicate the duration of the treatment N = normoxia, I = CIH, C = CCH (data in Supplemental Table 6). The color of the elements in the columns (green for negative, red for positive and black for null values) are associated to the binary logarithms of the normalized and scaled individual measurements of genes for all 36 mice studied (columns labeled **1I1**, ..., **1I4**, ..., **4C4**) and to the fold change ratios (negative for down-regulation) when comparing the average expression for the two sets of mice subjected to the indicated treatments for the same period of time (columns labeled **1I/N**, ..., **4C/N**, **1C/I**, ..., **4C/I**). Individual values were normalized to the average of the corresponding normoxic values and then the results of each group of four mice subjected to the same condition were rescaled with respect to the average of that group so that the standard deviation was reduced by a factor of 4. The genes were clustered through the centered correlation method (i.e. using

the Pearson correlation coefficient  $r = \frac{1}{45} \sum_{i=1}^{45} \left( \frac{X_i - \bar{X}}{\sigma_X} \right) \left( \frac{Y_i - \bar{Y}}{\sigma_Y} \right)$  between any two series  $X$  and  $Y$ , each

composed of 45 numbers: the 36 normalized and scaled individual measurements + the 9 fold changes when comparing the averages of any two treatments for all three durations) without any additional filtering and normalization. We used the GeneCluster and the TreeView programs of Michael Eisen (<http://rana.lbl.gov/EisenSoftware.htm>). Note both the variability and the reproducibility of the gene expression patterns among the mice subjected to the same condition. The columns of the individual normoxic mice are mostly black (i.e. values close to  $0 = \log_2 1$ ) since the averages of their individual values were used to normalize the individual values of all mice exposed for the same duration to normoxia, CCH and CIH. Green/red colors in the last three columns indicate the differences between the two hypoxic treatments at each duration, with green indicating smaller fold change in CCH than in CIH.

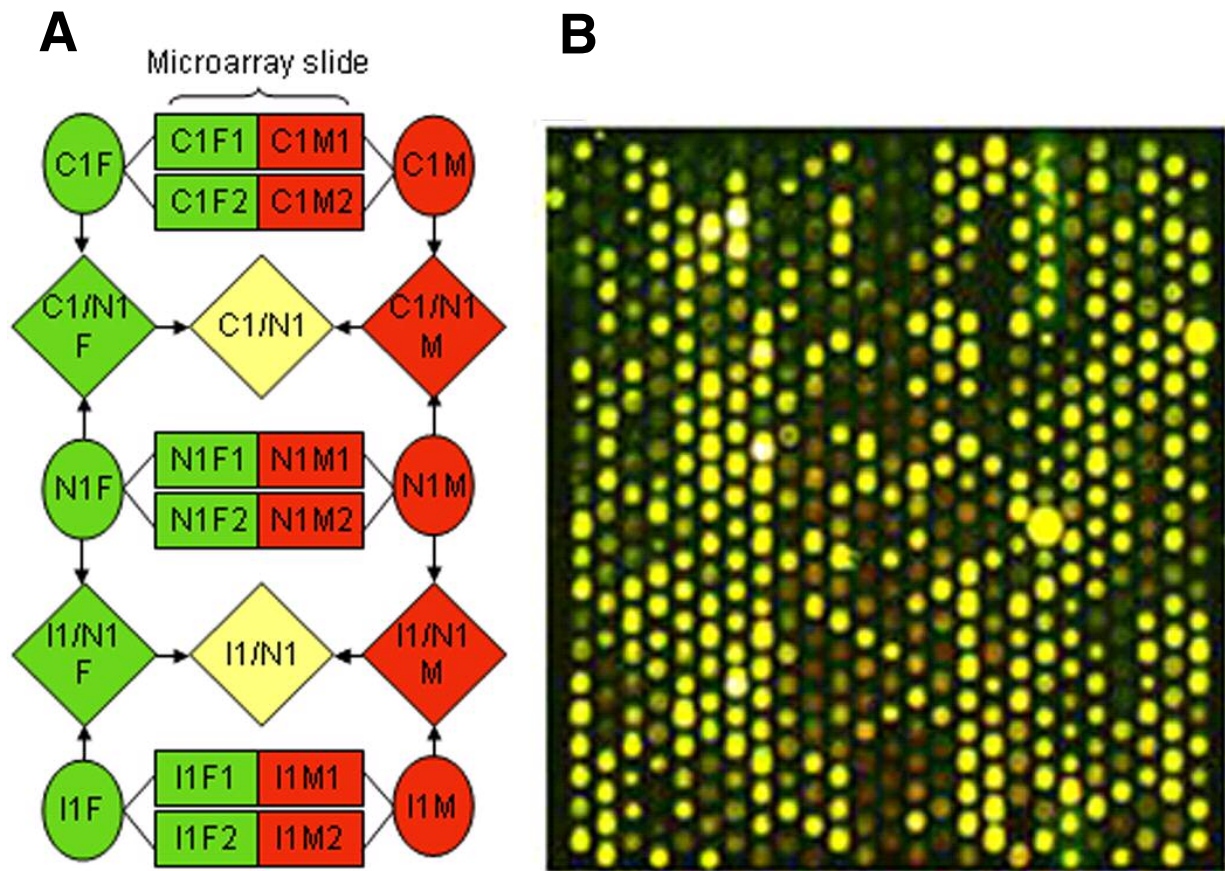

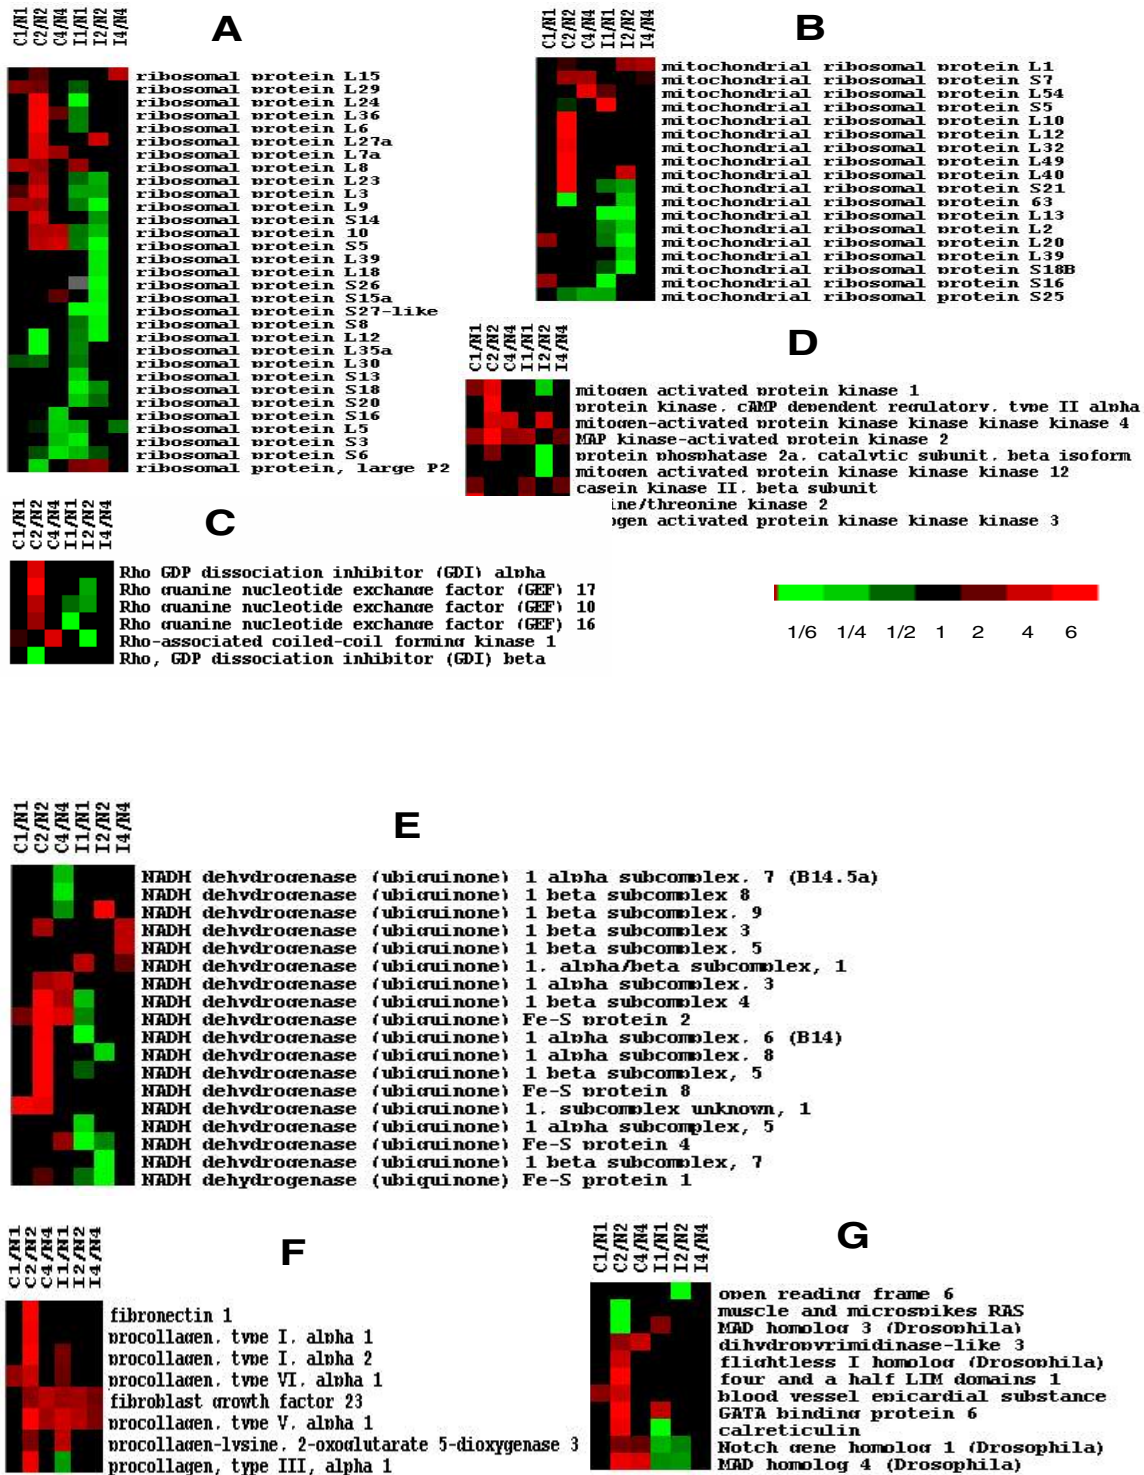

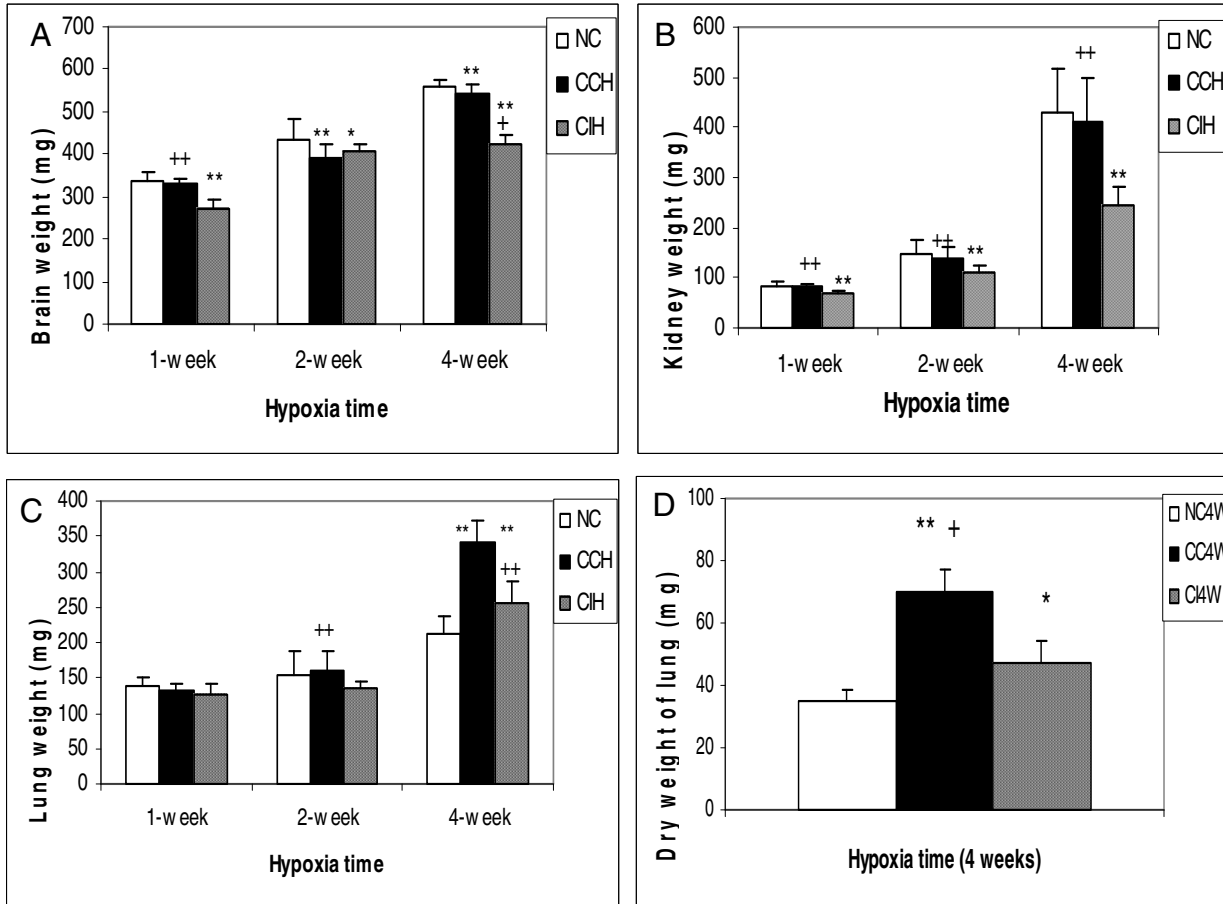

## Supplemental Table Legends

Supplemental Table 1. Significantly regulated genes in all three time points in CCH heart. CHR = chromosomal location of the gene, C1,2,4 = expression ratio after 1,2,4 weeks CCH treatment, P-C1,2,4 = p-value of the expression regulation after 1,2,4 weeks CCH.

Supplemental Table 2. Significantly regulated genes in all three time points in CIH heart. CHR = chromosomal location of the gene, I1,2,4 = expression ratio after 1,2,4 weeks CIH treatment, P-I1,2,4 = p-value of the expression regulation after 1,2,4 weeks CIH.

Supplemental Table 3. Significantly regulated genes over 5-fold in CCH heart. Missing values indicate either not-quantified or not-significant regulation at that time-point.

Supplemental Table 4. Significantly regulated genes over 5-fold in CIH heart. Missing values indicate either not-quantified or not-significant regulation at that time-point.

Supplemental Table 5. Primers used in QRT-PCR, a description of their genebank numbers, gene symbols, gene names and functions.

Supplemental Table 6. Individual values and expression ratios before Bonferroni correction and data averaging to reduce the redundancy. The table was restricted to the 7028 adequately quantified spots in all arrays that passed both the  $\pm 1.5$  fold change and  $p < 0.05$  criteria in a paired heteroscedastic Student's t-test for at least one comparison between the average expression levels among treatments, namely: 1,2,4I vs 1,2,4N, 1,2,4C vs 1,2,4N, 1,2,4C vs 1,2,4I, where the numbers 1, 2 and 4 indicate the duration of the treatment N = normoxia, I = CIH, C = CCH. **1I1, ..., 1I4, ..., 4C4** = binary logarithms of individual measurements of genes for all 36 studied mice (4 mice for each combination duration-treatment). Each value was normalized to the average of the corresponding normoxic values and then

the results of each group of four mice subjected to the same condition were rescaled with respect to the average of that group so that the standard deviation was reduced by a factor of 4. **1I/N, ..., 4C/N, 1C/I, ..., 4C/I** = fold change (negative for down-regulation) when comparing the two sets of four mice subjected to the indicated treatments for 1, 2 or 4 weeks.  $P(1I/N), \dots, P(4C/I)$  = p-values. The genes were clustered through the centered correlation method (i.e. using the Pearson correlation coefficient

$$r = \frac{1}{45} \sum_{i=1}^{45} \left( \frac{X_i - \bar{X}}{\sigma_X} \right) \left( \frac{Y_i - \bar{Y}}{\sigma_Y} \right)$$

between any two series  $X$  and  $Y$ , each composed of 45 numbers: the 36 normalized and scaled individual measurements + the 9 fold changes when comparing the averages of any two treatments for all three durations) using the GeneCluster program of Michael Eisen

(<http://rana.lbl.gov/EisenSoftware.htm>) without any additional filtering and normalization.



| SUPPLEMENTAL TABLE 1: SIGNIFICANTLY REGULATED GENES IN ALL THREE TIMEPOINTS IN CCH HEART     |          |     |       |       |       |       |       |       |
|----------------------------------------------------------------------------------------------|----------|-----|-------|-------|-------|-------|-------|-------|
| GENE NAME                                                                                    | SYMBOL   | CHR | C1    | P-C1  | C2    | P-C2  | C4    | P-C4  |
| a disintegrin-like and metalloprotease (reprolysin type) with thrombospondin type 1 motif, 4 | Adamts4  | 1   | -1.68 | 0.006 | -2.93 | 0.000 | -2.77 | 0.002 |
| alkaline phosphatase 5                                                                       | Akp5     | 1   | 2.04  | 0.040 | -2.93 | 0.004 | -2.52 | 0.001 |
| annexin A7                                                                                   | Anxa7    | 14  | 1.51  | 0.002 | -1.54 | 0.029 | 1.90  | 0.036 |
| ATPase, H <sup>+</sup> transporting, V0 subunit C                                            | Atp6v0c  | 17  | 1.82  | 0.010 | 1.68  | 0.007 | 1.84  | 0.022 |
| BCL2/adenovirus E1B 19kDa-interacting protein 1, NIP3                                        | Bnip3    | 7   | 1.57  | 0.029 | 3.02  | 0.003 | -1.72 | 0.040 |
| Bernardinelli-Seip congenital lipodystrophy 2 homolog (human)                                | Bscl2    | 19  | 1.68  | 0.013 | 1.64  | 0.026 | -1.57 | 0.008 |
| ceroid-lipofuscinosis, neuronal 2                                                            | Cln2     | 7   | 1.91  | 0.020 | -1.97 | 0.016 | 1.63  | 0.038 |
| chemokine (C-X-C motif) ligand 12                                                            | Cxcl12   | 6   | 2.01  | 0.022 | 2.79  | 0.001 | 1.86  | 0.019 |
| citrate synthase                                                                             | Cs       | 10  | 1.67  | 0.022 | 2.22  | 0.049 | -2.03 | 0.012 |
| deformed epidermal autoregulatory factor 1 (Drosophila)                                      | Deaf1    | 7   | -1.96 | 0.005 | -2.51 | 0.001 | -2.35 | 0.024 |
| dynamamin 1-like                                                                             | Dnm1l    | 16  | 2.09  | 0.025 | -1.62 | 0.025 | 1.92  | 0.028 |
| filamin, alpha                                                                               | Flna     | X   | 1.77  | 0.018 | 1.92  | 0.000 | -1.96 | 0.019 |
| folistatin-like                                                                              | Fstl     | 16  | 2.21  | 0.005 | 1.65  | 0.005 | -2.95 | 0.015 |
| glypican 3                                                                                   | Gpc3     | X   | 1.54  | 0.006 | 1.72  | 0.000 | 2.61  | 0.040 |
| golgi apparatus protein 1                                                                    | Glg1     | 8   | 1.66  | 0.021 | 1.52  | 0.038 | -2.34 | 0.005 |
| Harvey rat sarcoma oncogene, subgroup R                                                      | Rras     | 7   | 1.51  | 0.008 | 1.67  | 0.005 | 2.31  | 0.029 |
| heat shock protein 1 (chaperonin)                                                            | Hspd1    | 11  | 1.75  | 0.038 | 2.25  | 0.008 | 2.16  | 0.031 |
| integral membrane protein 2B                                                                 | Itm2b    | 11  | 1.55  | 0.003 | 2.08  | 0.008 | 1.69  | 0.017 |
| kinesin family member 5B                                                                     | Kif5b    | 18  | 1.65  | 0.022 | 1.91  | 0.008 | 1.98  | 0.012 |
| LIM domain only 2                                                                            | Lmo2     | 2   | 1.62  | 0.012 | -1.69 | 0.004 | -2.46 | 0.008 |
| makorin, ring finger protein, 2                                                              | Mkrn2    | 6   | 1.73  | 0.004 | 1.87  | 0.002 | -1.78 | 0.030 |
| MAP kinase-activated protein kinase 2                                                        | Mapkapk2 | 1   | 1.64  | 0.015 | 2.36  | 0.008 | 1.64  | 0.016 |
| MAP kinase-activated protein kinase 5                                                        | Mapkapk5 | 5   | -1.77 | 0.001 | 1.83  | 0.048 | -2.58 | 0.006 |
| mitochondrial ribosomal protein L28                                                          | Mrpl28   | 17  | -2.64 | 0.000 | 1.80  | 0.018 | 1.87  | 0.007 |
| NADH dehydrogenase (ubiquinone) Fe-S protein 2                                               | Ndufs2   | 1   | 1.54  | 0.009 | 2.56  | 0.001 | 2.32  | 0.019 |
| pleckstrin homology domain containing, family C (with FERM domain) member 1                  | Plekhc1  | 14  | 2.09  | 0.006 | 1.84  | 0.044 | 2.26  | 0.019 |
| protein phosphatase 1, regulatory subunit 9B                                                 | Ppp1r9b  | 11  | 1.82  | 0.001 | -2.93 | 0.001 | -2.54 | 0.004 |
| serine/threonine kinase 23                                                                   | Stk23    | X   | -1.54 | 0.000 | -1.66 | 0.031 | -2.48 | 0.002 |
| Sloan-Kettering viral oncogene homolog                                                       | Ski      | 4   | 1.87  | 0.018 | 1.99  | 0.004 | -2.59 | 0.011 |
| sno, strawberry notch homolog 1 (Drosophila)                                                 | Sbno1    | 5   | -1.76 | 0.002 | -1.54 | 0.002 | -1.81 | 0.015 |
| solute carrier family 12, member 2                                                           | Slc12a2  | 18  | 2.08  | 0.004 | 2.07  | 0.002 | 1.64  | 0.003 |
| solute carrier family 31, member 1                                                           | Slc31a1  | 4   | 1.53  | 0.020 | 2.05  | 0.016 | -1.61 | 0.041 |
| solute carrier family 43, member 1                                                           | Slc43a1  | 2   | 2.11  | 0.020 | -1.79 | 0.006 | -1.75 | 0.004 |
| spectrin beta 2                                                                              | Spnb2    | 11  | 1.79  | 0.003 | 1.88  | 0.001 | 1.93  | 0.025 |
| synaptopodin                                                                                 | Synpo    | 18  | 1.86  | 0.042 | -2.30 | 0.000 | -1.79 | 0.002 |
| syndecan binding protein                                                                     | Sdcbp    | 4   | 1.52  | 0.014 | -4.15 | 0.000 | -2.08 | 0.022 |
| von Hippel-Lindau binding protein 1                                                          | Vbp1     | X   | 1.71  | 0.030 | -1.56 | 0.010 | 2.90  | 0.044 |
| zinc finger protein 91                                                                       | Zfp91    | 19  | 1.64  | 0.030 | 2.29  | 0.003 | 1.65  | 0.028 |

**SUPPLEMENTAL TABLE 2: SIGNIFICANTLY REGULATED GENES IN ALL THREE TIMEPOINTS IN CIH HEART**

| GENE NAME                                                 | SYMBOL  | CHR | I1    | P-I1  | I2    | P-I2  | I4    | P-I4  |
|-----------------------------------------------------------|---------|-----|-------|-------|-------|-------|-------|-------|
| acetyl-Coenzyme A dehydrogenase, long-chain               | Acadl   | 1   | 1.51  | 0.048 | -2.15 | 0.028 | 1.63  | 0.029 |
| aldolase 2, B isoform                                     | Aldo2   | 4   | -2.19 | 0.034 | -3.86 | 0.009 | -2.48 | 0.017 |
| ATPase, H+ transporting, V0 subunit                       | Atp6v0e | 17  | -1.68 | 0.042 | -2.10 | 0.003 | 1.53  | 0.037 |
| BCL2/adenovirus E1B 19kDa-interacting protein 1, NIP3     | Bnip3   | 7   | 1.56  | 0.037 | 2.13  | 0.018 | -1.59 | 0.021 |
| ceroid-lipofuscinosis, neuronal 2                         | Cln2    | 7   | 1.99  | 0.015 | -1.68 | 0.029 | 1.63  | 0.001 |
| complement component 1, q subcomponent, gamma polypeptide | C1qg    | 4   | 1.77  | 0.002 | -1.76 | 0.008 | -1.61 | 0.024 |
| DEAD (Asp-Glu-Ala-Asp) box polypeptide 24                 | Ddx24   | 12  | 2.04  | 0.000 | -1.84 | 0.025 | 1.87  | 0.016 |
| DEAD (Asp-Glu-Ala-Asp) box polypeptide 5                  | Ddx5    | 11  | 1.61  | 0.045 | -2.29 | 0.012 | 1.82  | 0.002 |
| fibroblast growth factor 23                               | Fgf23   | 6   | 1.78  | 0.014 | 1.84  | 0.002 | 1.54  | 0.024 |
| hyaluronidase 2                                           | Hyal2   | 9   | -1.64 | 0.016 | 1.90  | 0.031 | -1.67 | 0.020 |
| isocitrate dehydrogenase 2 (NADP+), mitochondrial         | Idh2    | 7   | -1.62 | 0.010 | 1.71  | 0.044 | 1.53  | 0.034 |
| karyopherin (importin) alpha 1                            | Kpna1   | 11  | 2.51  | 0.000 | -1.63 | 0.000 | -2.03 | 0.000 |
| large tumor suppressor 2                                  | Lats2   | 14  | 1.93  | 0.023 | -1.83 | 0.003 | 1.60  | 0.001 |
| NMDA receptor-regulated gene 1                            | Narg1   | 3   | 1.64  | 0.042 | -1.81 | 0.012 | 1.66  | 0.040 |
| polyadenylate binding protein-interacting protein 1       | Paip1   | 13  | -1.66 | 0.000 | -2.33 | 0.001 | 1.58  | 0.002 |
| polymerase (RNA) II (DNA directed) polypeptide B          | Polr2b  | 5   | -1.56 | 0.039 | -1.50 | 0.035 | -1.64 | 0.036 |
| proteasome (prosome, macropain) 28 subunit, alpha         | Psmc1   | 14  | -1.66 | 0.004 | 2.49  | 0.014 | -1.62 | 0.046 |
| proteasome (prosome, macropain) inhibitor subunit 1       | Psmf1   | 2   | 2.19  | 0.011 | -1.77 | 0.012 | -1.77 | 0.000 |
| replication factor C 1                                    | Recc1   | 5   | -1.68 | 0.016 | 1.60  | 0.014 | -1.74 | 0.028 |
| ribosomal protein 10                                      | Rpl10   | X   | -1.63 | 0.027 | -2.14 | 0.006 | 1.69  | 0.046 |
| ribosomal protein S5                                      | Rps5    | 12  | -1.64 | 0.019 | -2.17 | 0.037 | 2.18  | 0.009 |
| secreted frizzled-related sequence protein 1              | Sfrp1   | 8   | 5.63  | 0.000 | 1.80  | 0.001 | 1.57  | 0.005 |
| thymopoietin                                              | Tmpo    | 10  | -1.72 | 0.027 | 1.86  | 0.015 | 1.63  | 0.023 |
| tripartite motif protein 6                                | Trim6   | 7   | 4.07  | 0.035 | -1.69 | 0.025 | -1.97 | 0.001 |
| tubulin, alpha 8                                          | Tuba8   | 6   | -3.16 | 0.000 | -2.26 | 0.034 | 2.43  | 0.028 |
| ubiquitin-like 5                                          | Ubl5    | 9   | -1.51 | 0.011 | -2.64 | 0.019 | 1.79  | 0.019 |
| unc-5 homolog B (C. elegans)                              | Unc5b   | 10  | -1.79 | 0.023 | -1.88 | 0.023 | -1.51 | 0.018 |
| vacuolar protein sorting 28 (yeast)                       | Vps28   | 15  | -1.56 | 0.008 | -1.83 | 0.042 | 1.59  | 0.007 |

| SUPPLEMENTAL TABLE 3. SIGNIFICANTLY REGULATED GENES OVER 5-FOLD IN CCH    |          |     |       |       |        |       |       |       |
|---------------------------------------------------------------------------|----------|-----|-------|-------|--------|-------|-------|-------|
| GENE NAME                                                                 | SYMBOL   | CHR | C1    | P-C1  | C2     | P-C2  | C4    | P-C4  |
| afamin                                                                    | Afm      | 5   | -1.67 | 0.005 | -5.52  | 0.001 |       |       |
| aldo-keto reductase family 1, member A4 (aldehyde reductase)              | Akr1a4   | 4   | 1.83  | 0.000 | -5.03  | 0.010 |       |       |
| ankyrin repeat and SOCS box-containing protein 3                          | Asb3     | 11  | -1.90 | 0.003 | -5.45  | 0.000 |       |       |
| catenin src                                                               | Catns    | 2   |       |       | -7.30  | 0.000 |       |       |
| epidermodysplasia verruciformis 2                                         | Ever2    | 11  |       |       | -10.16 | 0.002 |       |       |
| glucose phosphate isomerase 1                                             | Gpi1     | 7   |       |       | 5.18   | 0.000 |       |       |
| golgi associated PDZ and coiled-coil motif containing                     | Gopc     | 10  |       |       | -6.33  | 0.002 |       |       |
| heat shock protein 4                                                      | Hsp70-4  | 2   |       |       | -5.58  | 0.001 | -1.50 | 0.019 |
| integrin beta 1 binding protein 1                                         | Itgb1bp1 | 12  |       |       | -7.59  | 0.000 |       |       |
| interferon consensus sequence binding protein 1                           | Icsbp1   | 8   |       |       | -6.06  | 0.000 |       |       |
| isocitrate dehydrogenase 2 (NADP+), mitochondrial                         | Idh2     | 7   |       |       | 5.25   | 0.000 |       |       |
| myosin light chain, phosphorylatable, fast skeletal muscle                | Mylpf    | 7   |       |       | -39.43 | 0.043 |       |       |
| natriuretic peptide precursor type B                                      | Nppb     | 4   | 2.66  | 0.037 | 5.64   | 0.000 |       |       |
| Ngg1 interacting factor 3-like 1 (S. pombe)                               | Nif3l1   | 1   |       |       | -6.17  | 0.000 | -1.58 | 0.028 |
| ornithine decarboxylase antizyme inhibitor                                | Oazin    | 15  |       |       | -9.50  | 0.000 |       |       |
| peptidyl arginine deiminase, type II                                      | Padi2    | 4   |       |       | -5.24  | 0.001 |       |       |
| prostaglandin D2 synthase (brain)                                         | Ptgds    | 2   |       |       | 5.21   | 0.001 |       |       |
| protein kinase C and casein kinase substrate in neurons 2                 | Paccin2  | 15  | 2.17  | 0.032 | -5.76  | 0.008 |       |       |
| regulating synaptic membrane exocytosis 3                                 | Rims3    | 4   |       |       | -6.15  | 0.000 | -1.54 | 0.008 |
| retinol binding protein 1, cellular                                       | Rbp1     | 9   |       |       | -10.13 | 0.001 |       |       |
| ribosomal protein L35a                                                    | Rpl35a   | 11  |       |       | -8.03  | 0.000 |       |       |
| ribosomal protein L36                                                     | Rpl36    | 11  |       |       | 6.59   | 0.000 | 1.52  | 0.033 |
| ribosomal protein S27a                                                    | Rps27a   | 9   | 1.52  | 0.044 | -17.50 | 0.000 |       |       |
| small optic lobes homolog (Drosophila)                                    | Solh     | 17  |       |       | -6.04  | 0.000 | -1.69 | 0.021 |
| TAF10 RNA polymerase II, TATA box binding protein (TBP)-associated factor | Taf10    | 7   |       |       | -5.32  | 0.002 |       |       |
| thioredoxin-like                                                          | Txnl     | 18  |       |       | -6.34  | 0.000 |       |       |
| Zinc finger protein 212                                                   | Znf212   | 6   | -3.01 | 0.032 | 5.93   | 0.000 |       |       |

| SUPPLEMENTAL TABLE 4. SIGNIFICANTLY REGULATED GENES OVER 5-FOLD IN CIH             |        |     |       |       |        |       |      |       |
|------------------------------------------------------------------------------------|--------|-----|-------|-------|--------|-------|------|-------|
| GENE NAME                                                                          | SYMBOL | CHR | I1    | P-I1  | I2     | P-I2  | I4   | P-I4  |
| actinin alpha 3                                                                    | Actn3  | 19  |       |       | -5.45  | 0.000 |      |       |
| aminolevulinic acid synthase 2, erythroid                                          | Alas2  | X   | 2.50  | 0.007 | 6.68   | 0.040 |      |       |
| brachyury 2                                                                        | T2     | 17  | 5.49  | 0.036 |        |       |      |       |
| carboxypeptidase B2 (plasma)                                                       | Cpb2   | 14  | 5.63  | 0.001 |        |       |      |       |
| CDC23 (cell division cycle 23, yeast, homolog)                                     | Cdc23  | 18  | 5.14  | 0.001 |        |       |      |       |
| creatine kinase, mitochondrial 1, ubiquitous                                       | Ckmt1  | 2   | -2.04 | 0.001 | -6.54  | 0.005 |      |       |
| cyclin L1                                                                          | Ccn1   | 3   | -1.69 | 0.004 | -5.52  | 0.003 |      |       |
| dopachrome tautomerase                                                             | Dct    | 14  | 1.55  | 0.011 | -8.02  | 0.037 |      |       |
| ferrochelatase                                                                     | Fech   | 11  | 2.29  | 0.048 | 5.12   | 0.039 |      |       |
| growth factor independent 1B                                                       | Gfi1b  | 2   | 6.80  | 0.000 | 1.99   | 0.008 |      |       |
| hemoglobin Y, beta-like embryonic chain                                            | Hbb-y  | 7   |       |       | -5.96  | 0.049 |      |       |
| interferon activated gene 203                                                      | Ifi203 | 1   | 6.05  | 0.006 | 1.81   | 0.002 |      |       |
| interferon-stimulated protein                                                      | Isg20  | 7   |       |       | 5.68   | 0.044 |      |       |
| membrane-spanning 4-domains, subfamily A, member 4C                                | Ms4a4c | 19  | 5.51  | 0.000 |        |       |      |       |
| myosin light chain, phosphorylatable, fast skeletal muscle                         | Mylpf  | 7   |       |       | -19.72 | 0.048 |      |       |
| nuclear receptor-binding SET-domain protein 1                                      | Nsd1   | 8   | 5.99  | 0.000 |        |       |      |       |
| peptidylprolyl isomerase A                                                         | Ppia   | 11  |       |       | 6.21   | 0.000 |      |       |
| resistin like beta                                                                 | Retnlb | 16  | 6.45  | 0.000 | 1.54   | 0.041 |      |       |
| secreted frizzled-related sequence protein 1                                       | Sfrp1  | 8   | 5.63  | 0.000 | 1.80   | 0.001 | 1.57 | 0.005 |
| small optic lobes homolog (Drosophila)                                             | Solh   | 17  | 7.07  | 0.000 | 2.53   | 0.000 |      |       |
| synaptonemal complex protein 1                                                     | Sycp1  | 3   | 5.16  | 0.001 | -2.13  | 0.009 |      |       |
| UDP-N-acetyl-alpha-D-galactosamine:polypeptide N-acetylgalactosaminyltransferase 4 | Galnt4 | 10  | 6.36  | 0.000 | 1.97   | 0.002 |      |       |
| uncoupling protein 2, mitochondrial                                                | Ucp2   | 7   |       |       | 5.39   | 0.002 |      |       |
| uridine phosphorylase 1                                                            | Upp1   | 11  | 5.80  | 0.000 | 2.48   | 0.001 |      |       |
| vacuolar protein sorting 4b (yeast)                                                | Vps4b  | 1   | 6.34  | 0.000 |        |       |      |       |
| zinc finger protein 60                                                             | Zfp60  | 7   | 5.02  | 0.021 | 1.99   | 0.001 |      |       |

Supplemental Table 5. Primers in QRT-PCR

| Gene Symbols | Gene Name                                                                  | GenBank  | Function        | Primer Sequence                                   |
|--------------|----------------------------------------------------------------------------|----------|-----------------|---------------------------------------------------|
| Bnip3l       | BCL2/adenovirus E1B 19kDa-interacting protein 3-like                       | AA028342 | Apoptosis       | F: cagttccttctctctcttc<br>R: atctgeccatcttctgtgg  |
| Egln1        | EGL nine homolog 1 (C. elegans)                                            | C78486   | HIF degradation | F: cgccaaggttaagtgaggta<br>R: ggcgatgctggctgtactt |
| Madh4        | MAD homolog 4 (Drosophila)                                                 | AW551817 | Development     | F: atggctatgtgatccttcg<br>R: ccaaacgtcaccttcacct  |
| Solh         | small optic lobes homolog (Drosophila)                                     | AA245131 | Proteolysis     | F: cgactctgtggacatctgc<br>R: gaagagggcaactccagtg  |
| Capn5        | calpain 5                                                                  | AA268162 | Proteolysis     | F: gggacctcgacaccagagta<br>R: gccagaaattcatcctca  |
| Slc19a1      | solute carrier family 19 (folate transporter), member 1                    | AA475033 | Transport       | F: cctgtggagaagcactgaca<br>R: accagctggaccacagagt |
| Slc6a8       | solute carrier family 6 (neurotransmitter transporter, creatine), member 8 | AA473227 | Transport       | F: gctggcttgtgtctcttc<br>R: acaggcatcagtgtagacg   |
| Slc12a2      | solute carrier family 12, member 2                                         | AW553645 | Transport       | F: agactgtggtggagctgctt<br>R: caatctgagccttctctcc |
| Notch1       | Notch gene homolog 1 (Drosophila)                                          | AA265694 | Development     | F: cctgccactatggtcctgt<br>R: tggcactcattgatgttgg  |
| Rpl36        | ribosomal protein L36                                                      | AI464570 | Translation     | F: caccaaacacaccaagttcg<br>R: cgcttgccttggacacitt |
| Eif2s1       | eukaryotic translation initiation factor 2, subunit 1 alpha                | AW546615 | Translation     | F: tggagcaatgtgctttgac<br>R: tctccacaggccttcagact |
| Eif4e        | eukaryotic translation initiation factor 4E                                | AU016482 | Translation     | F: taccactaatccccacctg<br>R: agagtgccacctgttctgt  |
| Ndufb4       | NADH dehydrogenase (ubiquinone) 1 beta subcomplex 4                        | AA434897 | Metabolism      | F: tgccgagtatgacgtgtctc<br>R: ttggggctgtgtactgaa  |
